# Supplementary material
Source: PubMed Central journal article supplement (PMC8556656)
Supplement: mmc1.pdf [file mmc1.pdf]

## **Characterization of peptide binding to the SARS-CoV-2 host factor neuropilin**

Amie Jobe<sup>1</sup> and Ranjit Vijayan<sup>1,2,\*</sup>

<sup>1</sup> Department of Biology, College of Science, United Arab Emirates University, PO Box 15551, Al Ain, United Arab Emirates.

<sup>2</sup> The Big Data Analytics Center, United Arab Emirates University, PO Box 15551, Al Ain, United Arab Emirates.

\* Correspondence: [ranjit.v@uaeu.ac.ae](mailto:ranjit.v@uaeu.ac.ae)

**SUPPLEMENTARY INFORMATION**

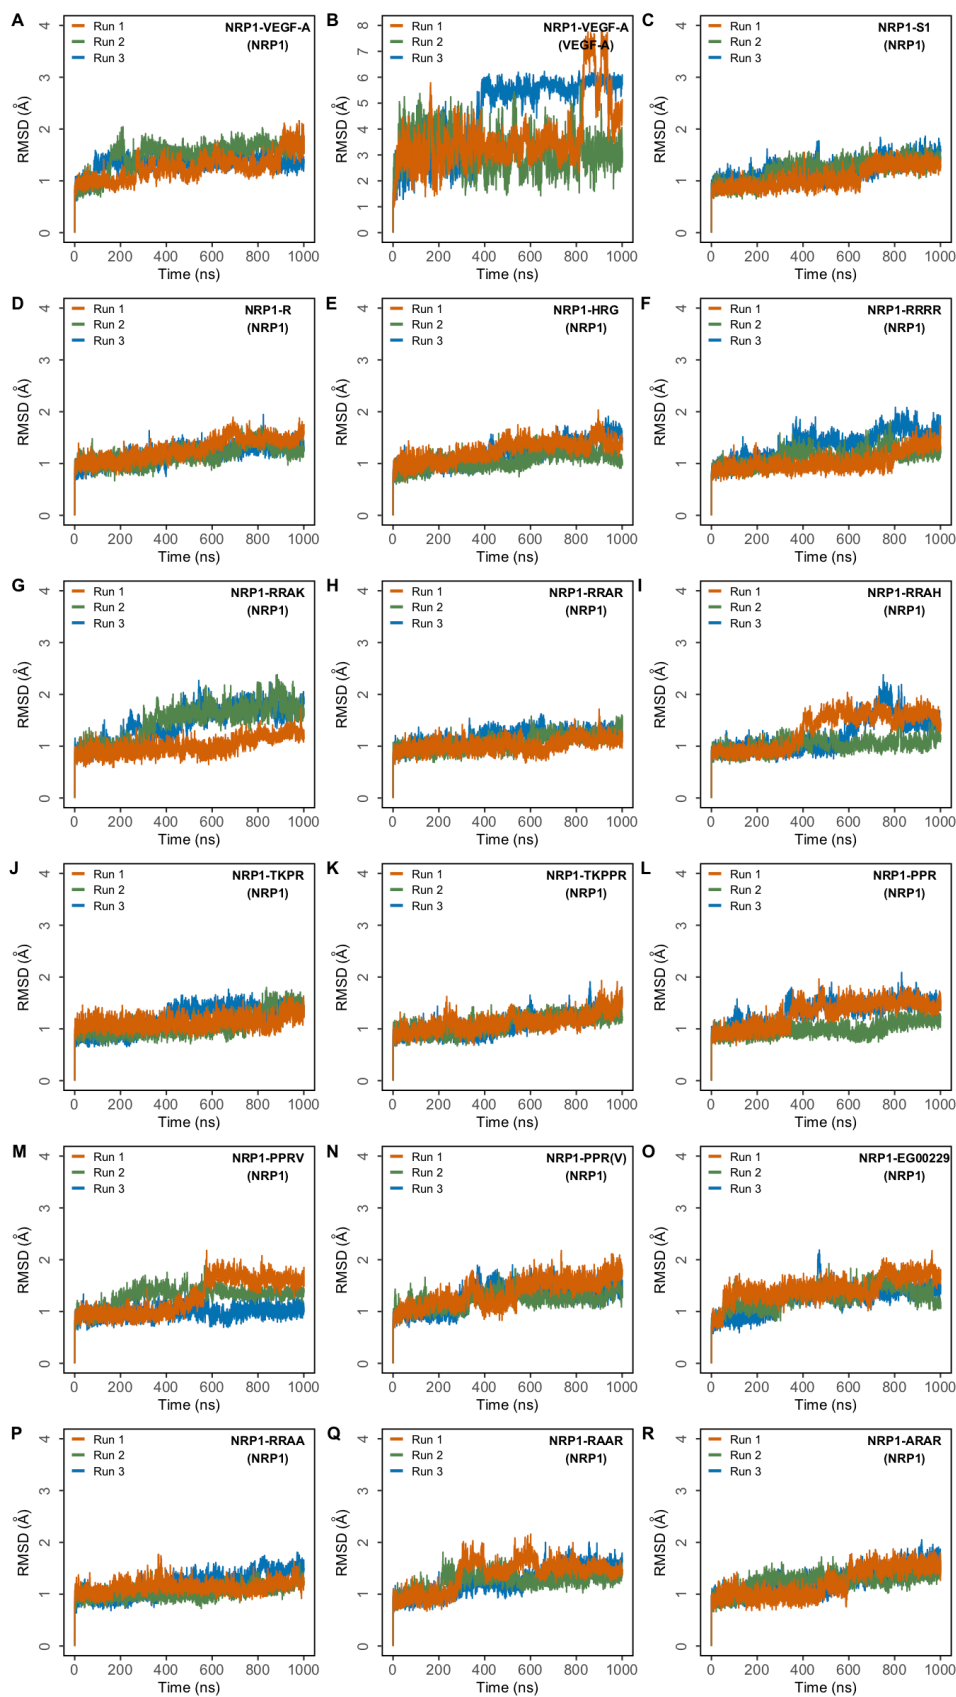

**Figure S1.** Root mean square deviation (RMSD) of protein C $\alpha$  atoms with respect to the initial structure obtained from three independent runs of the different peptides bound to NRP1. (A) NRP1 in the NRP1–VEGF-A complex; (B) VEGF-A in the NRP1–VEGF-A complex; (C) NRP1 in the NRP1–S1 complex; (D) NRP1 in the NRP1–R complex; (E) NRP1 in the NRP1–HRG complex; (F) NRP1 in the NRP1–RRRR complex; (G) NRP1 in the NRP1–RRAK complex; (H) NRP1 in the NRP1–RRAR complex; (I) NRP1 in the NRP1–RRAH complex; (J) NRP1 in the NRP1–TKPR complex; (K) NRP1 in the NRP1–TKPPR complex; (L) NRP1 in the NRP1–PPR complex; (M) NRP1 in the NRP1–PPRV complex; (N) NRP1 in the NRP1–PPR(V) complex; (O) NRP1 in the NRP1–EG00229 complex; (P) NRP1 in the NRP1–RRAA complex; (Q) NRP1 in the NRP1–RAAR complex; (R) NRP1 in the NRP1–ARAR complex.

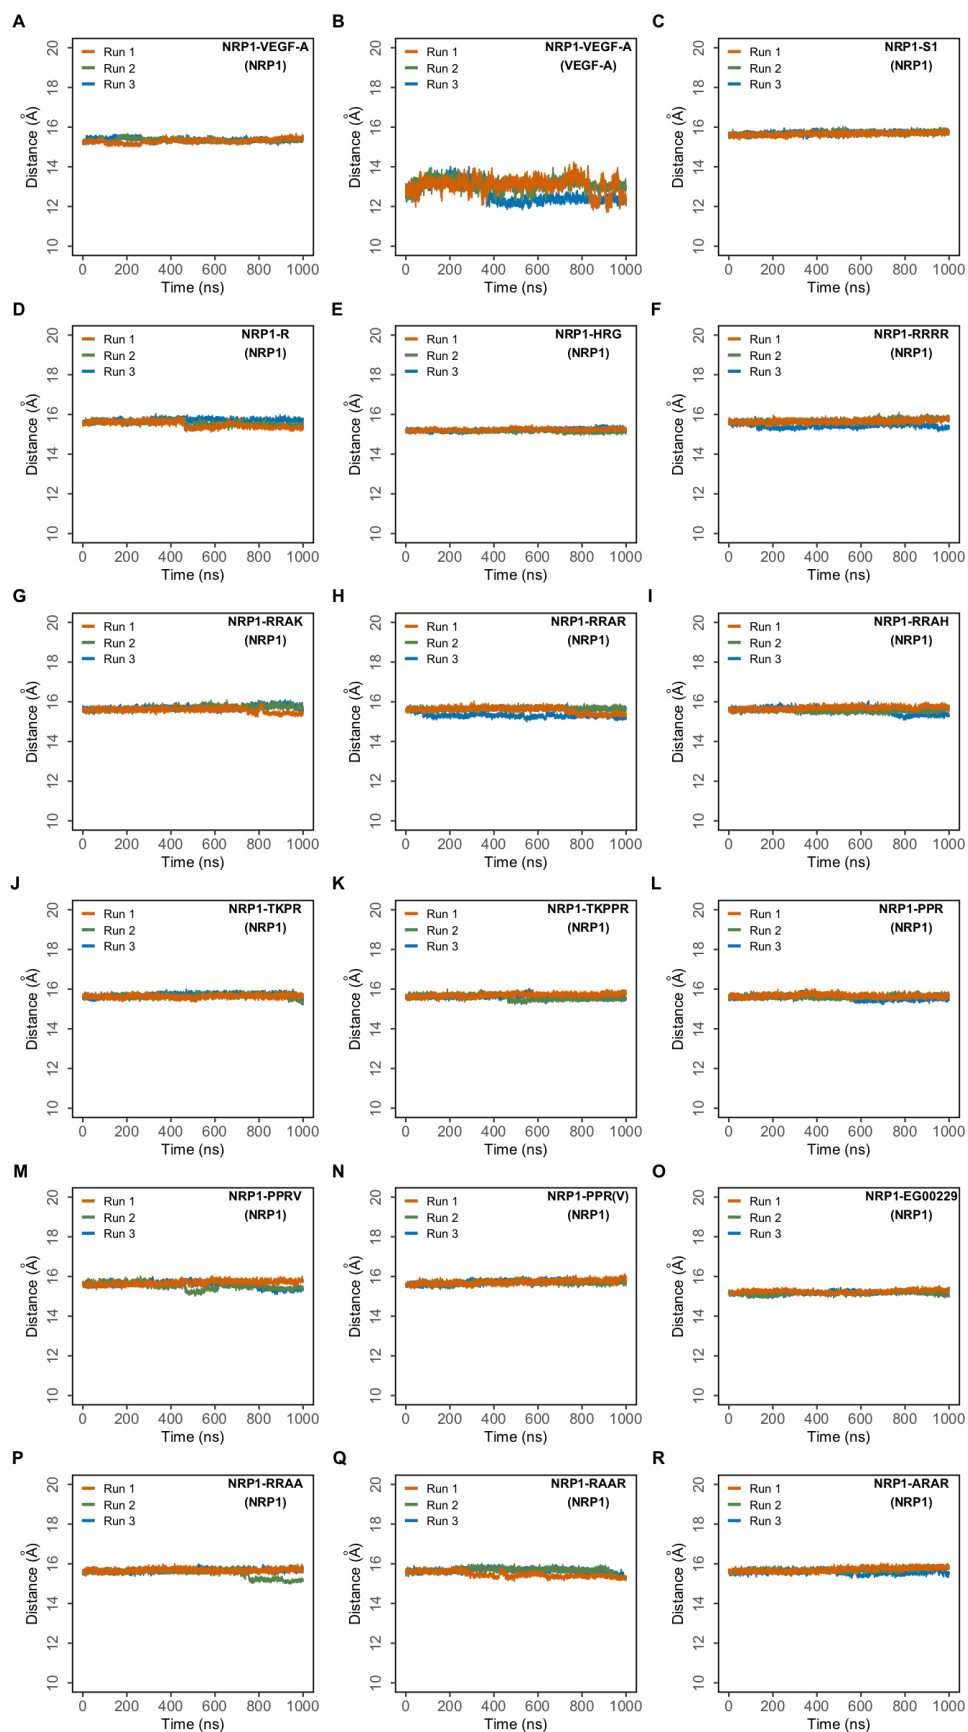

**Figure S2.** Radius of gyration ( $R_g$ ) of NRP1 or bound protein. Three  $1 \mu\text{s}$  simulations of each NRP1-peptide complex were performed. **(A)**  $R_g$  of NRP1 in NRP1-VEGF-A complex; **(B)**  $R_g$  of VEGF-A in NRP1-VEGF-A complex; **(C)**  $R_g$  of NRP1 in NRP1-S1 complex; **(D)**  $R_g$  of NRP1 in NRP1-R complex; **(E)**  $R_g$  of NRP1 in NRP1-HRG complex; **(F)**  $R_g$  of NRP1 in NRP1-RRRR complex; **(G)**  $R_g$  of NRP1 in NRP1-RAAK complex; **(H)**  $R_g$  of NRP1 in NRP1-RRAR complex; **(I)**  $R_g$  of NRP1 in NRP1-RAAH complex; **(J)**  $R_g$  of NRP1 in NRP1-TKPR complex; **(K)**  $R_g$  of NRP1 in NRP1-TKPPR complex; **(L)**  $R_g$  of NRP1 in NRP1-PPR complex; **(M)**  $R_g$  of NRP1 in NRP1-PPRV complex; **(N)**  $R_g$  of NRP1 in NRP1-PPR(V) complex; **(O)**  $R_g$  of NRP1 in the NRP1-EG00229 complex; **(P)**  $R_g$  of NRP1 in the NRP1-RAAA complex; **(Q)**  $R_g$  of NRP1 in the NRP1-RAAR complex; **(R)**  $R_g$  of NRP1 in the NRP1-ARAR complex.

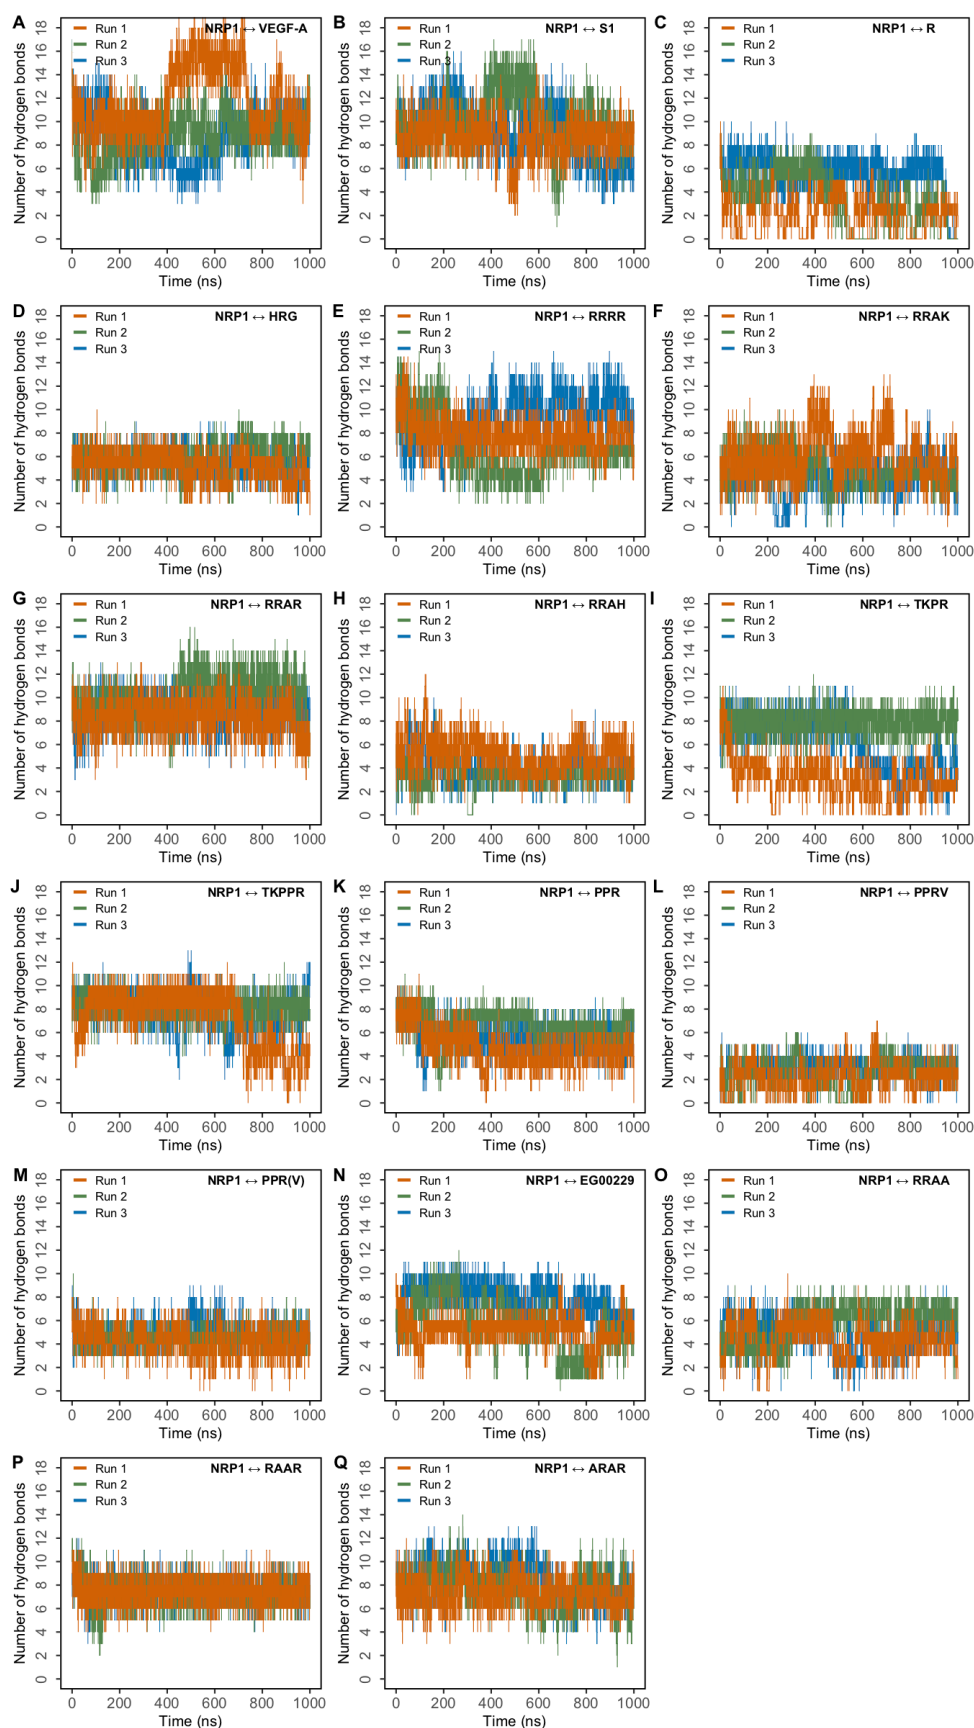

**Figure S3.** Number of intermolecular hydrogen bonds formed between NRP1 and the bound peptide from three independent 1  $\mu$ s simulations. (A) Between NRP1 and VEGF-A; (B) between NRP1 and S1; (C) between NRP1 and R; (D) between NRP1 and HRG; (E) between NRP1 and RRRR; (F) between NRP1 and RRAK; (G) between NRP1 and RRAR; (H) between NRP1 and RRAH; (I) between NRP1 and TKPR; (J) between NRP1 and TKPPR; (K) between NRP1 and PPR; (L) between NRP1 and PPRV; (M) between NRP1 and PPR(V); (N) between NRP1 and EG00229; (O) between NRP1 and RRAA; (P) between NRP1 and RAAR; (Q) between NRP1 and ARAR.

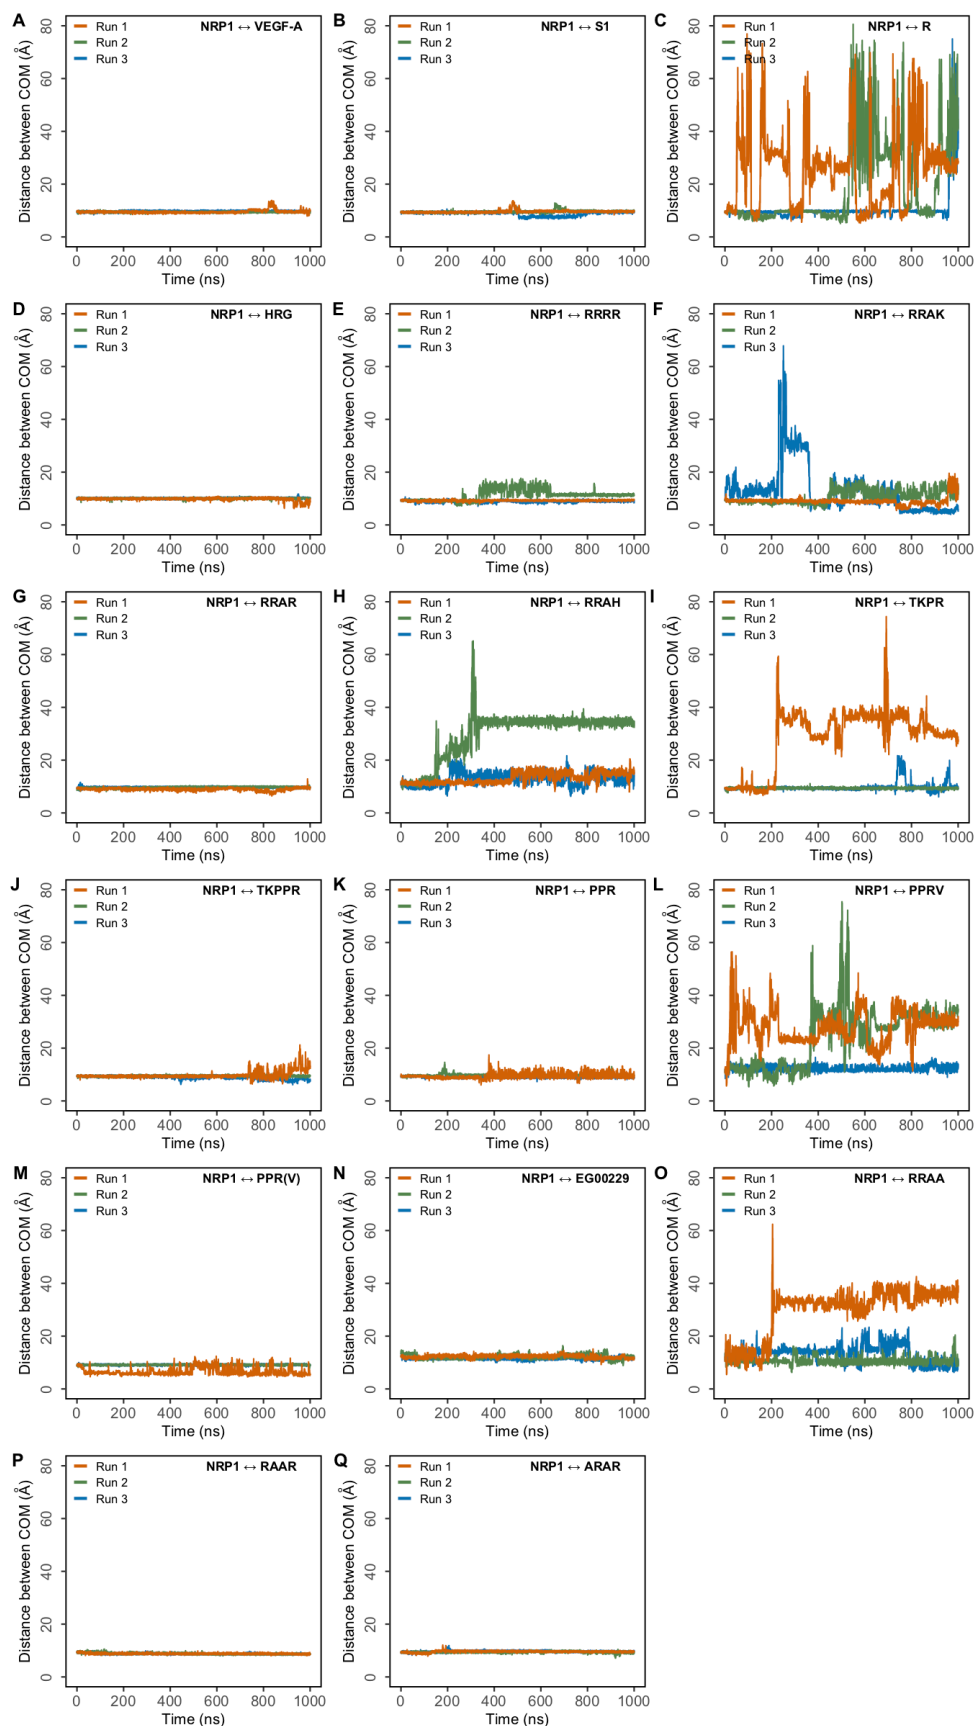

**Figure S4:** Distance between the center of mass (COM) of  $C\alpha$  atom of NRP1:Asp320 and  $C\alpha$  atom of the peptide residue equivalent to the terminal arginine (position 685). (A) between NRP1 and VEGF-A; (B) between NRP1 and S1; (C) between NRP1 and R; (D) between NRP1 and HRG; (E) between NRP1 and RRRR; (F) between NRP1 and RRAK; (G) between NRP1 and RRAR; (H) between NRP1 and RRAH; (I) between NRP1 and TKPR; (J) between NRP1 and TKPPR; (K) between NRP1 and PPR; (L) between NRP1 and PPRV; (M) between NRP1 and PPR(V); (N) between NRP1 and EG00229; (O) between NRP1 and RRAA; (P) between NRP1 and RAAR; (Q) between NRP1 and ARAR.

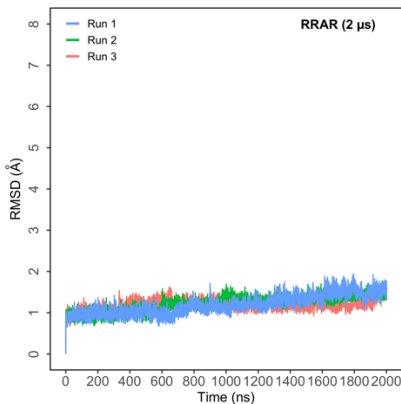

**Figure S5:** Root mean square deviation (RMSD) of protein  $C\alpha$  atoms with respect to the initial structure obtained from three independent 2  $\mu$ s runs of the peptide RRAR bound to NRP1.

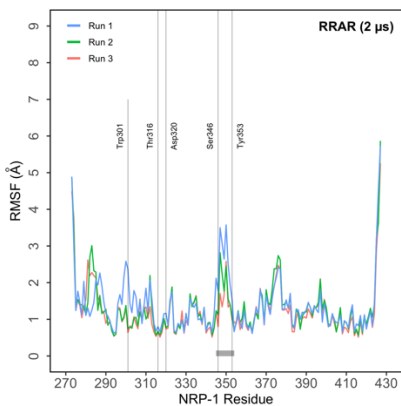

**Figure S6:** Root mean square fluctuation (RMSF) of protein  $C\alpha$  atoms obtained from three independent 2  $\mu$ s runs of the peptide RRAR bound to NRP.

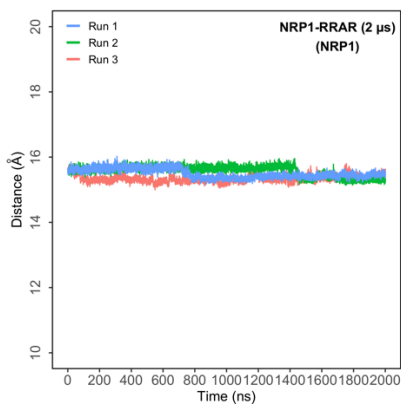

**Figure S7.** Radius of gyration ( $R_g$ ) of NRP1 from three independent 2  $\mu$ s simulations of RRAR bound to NRP1.

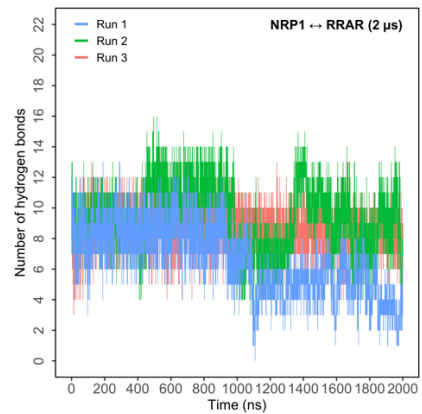

**Figure S8.** Number of intermolecular hydrogen bonds formed between NRP1 and the bound RRAR peptide from three independent 2  $\mu$ s simulations.

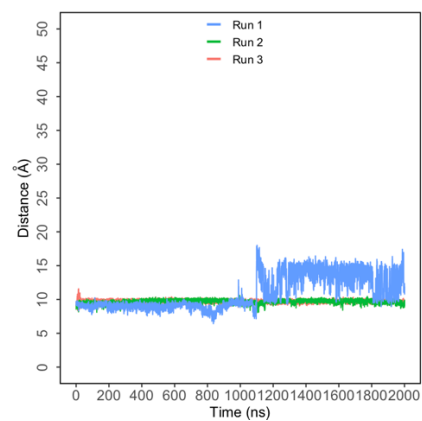

**Figure S9:** Distance between the center of mass of C $\alpha$  atom of NRP1:Asp320 and C $\alpha$  atom of C-terminal arginine of RRAR from three independent 2  $\mu$ s simulations.

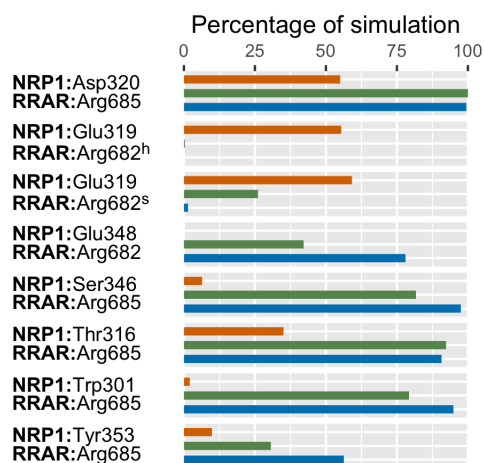

**Figure S10:** The percentage of simulation time during which intermolecular polar contacts were retained between NRP1 and the peptide RRAR in three independent 2  $\mu$ s runs.

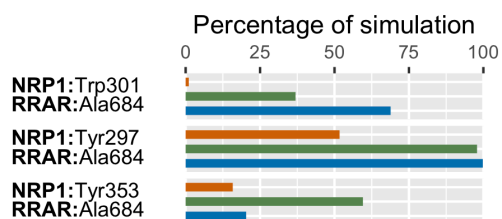

**Figure S11:** The percentage of simulation time during which intermolecular hydrophobic contacts were retained between NRP1 and the peptide RRAR in three independent 2  $\mu$ s runs.



**Table S1.** Free energy of binding ( $\Delta G_{\text{bind}}$ ) of peptides in the simulated systems computed using the MM-GBSA method. Rows in red text represent simulations in which the peptide dissociates from NRP1.

| Peptide          | Run  | $\Delta G_{\text{bind}}$ (kcal/mol) |  | Peptide | Run  | $\Delta G_{\text{bind}}$ (kcal/mol) |
|------------------|------|-------------------------------------|--|---------|------|-------------------------------------|
| VEGF A           | run1 | -85.81 $\pm$ 18.66                  |  | RRRR    | run1 | -79.22 $\pm$ 6.48                   |
|                  | run2 | -67.34 $\pm$ 11.27                  |  |         | run2 | -53.71 $\pm$ 17.68                  |
|                  | run3 | -82.07 $\pm$ 18.59                  |  |         | run3 | -80.54 $\pm$ 12.06                  |
|                  |      |                                     |  |         |      |                                     |
| HRG              | run1 | -54.44 $\pm$ 5.63                   |  | RRAH    | run1 | -58.28 $\pm$ 12.83                  |
|                  | run2 | -57.00 $\pm$ 4.91                   |  |         | run2 | -43.40 $\pm$ 22.11                  |
|                  | run3 | -57.53 $\pm$ 4.29                   |  |         | run3 | -41.66 $\pm$ 12.47                  |
|                  |      |                                     |  |         |      |                                     |
| S1               | run1 | -73.14 $\pm$ 11.75                  |  | RRAK    | run1 | -58.86 $\pm$ 11.55                  |
|                  | run2 | -90.93 $\pm$ 16.09                  |  |         | run2 | -48.88 $\pm$ 10.65                  |
|                  | run3 | -86.31 $\pm$ 14.15                  |  |         | run3 | -47.68 $\pm$ 19.12                  |
|                  |      |                                     |  |         |      |                                     |
| R                | run1 | -15.68 $\pm$ 10.18                  |  | TKPPR   | run1 | -57.68 $\pm$ 14.23                  |
|                  | run2 | -26.31 $\pm$ 17.57                  |  |         | run2 | -63.05 $\pm$ 5.14                   |
|                  | run3 | -43.65 $\pm$ 10.86                  |  |         | run3 | -74.50 $\pm$ 12.19                  |
|                  |      |                                     |  |         |      |                                     |
| PPR              | run1 | -44.62 $\pm$ 10.76                  |  | TKPR    | run1 | -23.67 $\pm$ 11.80                  |
|                  | run2 | -61.39 $\pm$ 6.14                   |  |         | run2 | -67.33 $\pm$ 5.31                   |
|                  | run3 | -56.56 $\pm$ 5.11                   |  |         | run3 | -51.48 $\pm$ 19.13                  |
|                  |      |                                     |  |         |      |                                     |
| PPRV             | run1 | -36.60 $\pm$ 10.45                  |  | ARAR    | run1 | -72.63 $\pm$ 7.79                   |
|                  | run2 | -37.90 $\pm$ 13.62                  |  |         | run2 | -66.50 $\pm$ 7.86                   |
|                  | run3 | -40.26 $\pm$ 4.85                   |  |         | run3 | -74.16 $\pm$ 6.97                   |
|                  |      |                                     |  |         |      |                                     |
| PPR(V)           | run1 | -57.49 $\pm$ 7.16                   |  | RRAA    | run1 | -45.00 $\pm$ 9.49                   |
|                  | run2 | -64.12 $\pm$ 5.11                   |  |         | run2 | -54.63 $\pm$ 6.46                   |
|                  | run3 | -68.26 $\pm$ 6.97                   |  |         | run3 | -50.23 $\pm$ 10.64                  |
|                  |      |                                     |  |         |      |                                     |
| RRAR             | run1 | -72.97 $\pm$ 7.26                   |  | RAAR    | run1 | -70.05 $\pm$ 5.27                   |
|                  | run2 | -84.60 $\pm$ 10.84                  |  |         | run2 | -68.95 $\pm$ 4.78                   |
|                  | run3 | -80.68 $\pm$ 7.38                   |  |         | run3 | -71.53 $\pm$ 6.08                   |
|                  |      |                                     |  |         |      |                                     |
| RRAR (2 $\mu$ s) | run1 | -59.37 $\pm$ 15.56                  |  | EG00229 | run1 | -78.92 $\pm$ 5.70                   |
|                  | run2 | -82.30 $\pm$ 10.52                  |  |         | run2 | -76.74 $\pm$ 10.52                  |
|                  | run3 | -80.81 $\pm$ 7.67                   |  |         | run3 | -93.05 $\pm$ 7.67                   |
